# Supplementary material for: Solkane® 365mfc is an environmentally benign alternative solvent for trifluoromethylation reactions
Source: Royal Society of Chemistry journal article supplement (doi:10.1039/b913984b), 2009-01-01
Supplement: b913984b.pdf [file b913984b.pdf]

## Supporting Information

### Solkane® 365mfc is an environmentally benign alternative solvent for trifluoromethylation reactions

Akihiro Kusuda, Hiroyuki Kawai, Shuichi Nakamura, Norio Shibata\*

Department of Applied Chemistry, Graduate School of Engineering, Nagoya Institute of Technology,  
Gokiso, Showa-ku, Nagoya 466-8555, Japan

#### Experimental Section

##### General Methods:

All reactions were performed in oven-dried glassware under a positive pressure of nitrogen. Solvents were transferred *via* syringe and were introduced into the reaction vessels through a rubber septum. All of the reactions were monitored by thin-layer chromatography (TLC) carried out on 0.25 mm Merck silica-gel (60-F254). The TLC plates were visualized with UV light and 7% phosphomolybdic acid or  $\text{KMnO}_4$  in water/heat. Column chromatography was carried out on a column packed with silica-gel 60N spherical neutral size 63-210  $\mu\text{m}$ . The  $^1\text{H-NMR}$  (200 MHz),  $^{19}\text{F-NMR}$  (188 MHz) spectra for solution in  $\text{CDCl}_3$  was recorded on a Varian Mercury 200. Chemical shifts ( $\delta$ ) are expressed in ppm downfield from internal TMS or  $\text{CHCl}_3$ . Mass spectra were recorded on a SHIMADZU GCMS-QP5050A. Infrared spectra were recorded on a JASCO FT/IR-200 spectrometer.

#### 1. General experimental procedure for the trifluoromethylation of carbonyl compounds:

To a stirred solution of **1** (0.20 mmol) and KOH (2.2 mg, 0.040 mmol) in Solkane® 365mfc (0.5 mL),  $\text{Me}_3\text{SiCF}_3$  (59.1  $\mu\text{L}$ , 0.40 mmol) was added at room temperature under nitrogen atmosphere. The mixture was stirred at room temperature. Then the solvent was removed in vacuo, and the product was purified by column chromatography (*n*-hexane: ethyl acetate=90:10) to give trifluoromethylated compounds **2**.

#### Trimethyl[2,2,2-trifluoro-1-(2-naphthalenyl)ethoxy]silane (**2a**).<sup>1</sup>

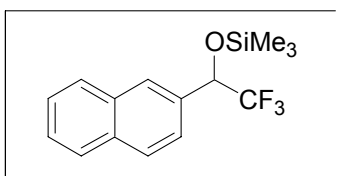

Reaction of **1a** (31.2 mg, 0.20 mmol), KOH (2.2 mg, 0.040 mmol),  $\text{Me}_3\text{SiCF}_3$  (59.1  $\mu\text{L}$ , 0.40 mmol)

in Solkane<sup>®</sup> 365mfc (0.5 mL) at room temperature for 20 min gave **2a** (57.3 mg, 96%) as a white solid. <sup>1</sup>H NMR (CDCl<sub>3</sub>) δ 0.14 (s, 9H), 5.07 (q, *J* = 6.6 Hz, 1H), 7.45–7.58 (m, 3H), 7.83–7.88 (m, 4H); <sup>19</sup>F NMR (CDCl<sub>3</sub>) δ -78.2 (d, *J* = 7.0 Hz, 3F); IR (KBr) 3066, 2958, 2927, 2856, 1363, 1262, 1177, 1128, 969, 900, 853, 818, 748, 697, 575, 548 cm<sup>-1</sup>; MS (EI, *m/z*) 298 (M<sup>+</sup>). These assignments are in good accord with those in the literature.<sup>1</sup>

#### Trimethyl[2,2,2-trifluoro-1-(1-naphthalenyl)ethoxy]silane (**2b**).<sup>1</sup>

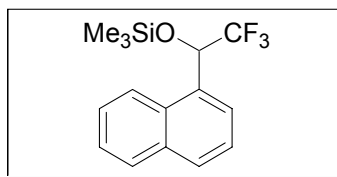

Reaction of **1b** (27.2 μL, 0.20 mmol), KOH (2.2 mg, 0.040 mmol), Me<sub>3</sub>SiCF<sub>3</sub> (59.1 μL, 0.40 mmol) in Solkane<sup>®</sup> 365mfc (0.5 mL) at room temperature for 30 min gave **2b** (54.7 mg, 92%) as a white solid. <sup>1</sup>H NMR (CDCl<sub>3</sub>) δ 0.09 (s, 9H), 5.74 (q, *J* = 6.2 Hz, 1H), 7.46–7.52 (m, 3H), 7.79–7.89 (m, 3H), 8.08 (d, *J* = 8.0 Hz, 1H); <sup>19</sup>F NMR (CDCl<sub>3</sub>) δ -77.4 (d, *J* = 6.0 Hz, 3F); IR (KBr) 3066, 2962, 1599, 1514, 1354, 1272, 1172, 1131, 1008, 875, 850, 798, 776, 751, 696, 633, 536, 442 cm<sup>-1</sup>; MS (EI, *m/z*) 298 (M<sup>+</sup>). These assignments are in good accord with those in the literature.<sup>1</sup>

#### Trimethyl[(2,2,2-trifluoro-1-phenylethoxy)]silane (**2c**).<sup>1</sup>

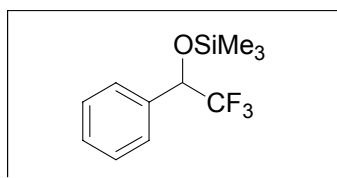

Reaction of **1c** (20.3 μL, 0.20 mmol), KOH (2.2 mg, 0.040 mmol), Me<sub>3</sub>SiCF<sub>3</sub> (59.1 μL, 0.40 mmol) in Solkane<sup>®</sup> 365mfc (0.5 mL) at room temperature for 15 min gave **2c** (45.4 mg, 91%) as a colorless oil. <sup>1</sup>H NMR (CDCl<sub>3</sub>) δ 0.12 (s, 9H), 4.90 (q, *J* = 6.6 Hz, 1H), 7.26–7.50 (m, 5H); <sup>19</sup>F NMR (CDCl<sub>3</sub>) δ -78.5 (d, *J* = 6.0 Hz, 3F); IR (neat) 3069, 3036, 2961, 2898, 1497, 1456, 1369, 1271, 1172, 1133, 1031, 882, 756, 701, 634, 552 cm<sup>-1</sup>; MS (EI, *m/z*) 248 (M<sup>+</sup>). These assignments are in good accord with those in the literature.<sup>1</sup>

#### Trimethyl[2,2,2-trifluoro-1-(4-methylphenyl)ethoxy]silane (**2d**).<sup>1</sup>

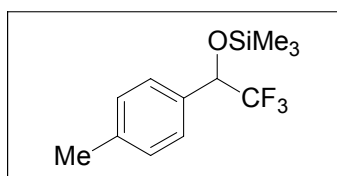

Reaction of **1d** (23.4 μL, 0.20 mmol), KOH (2.2 mg, 0.040 mmol), Me<sub>3</sub>SiCF<sub>3</sub> (59.1 μL, 0.40 mmol)

in Solkane<sup>®</sup> 365mfc (0.5 mL) at room temperature for 1 h gave **2d** (47.2 mg, 90%) as a colorless oil. <sup>1</sup>H NMR (CDCl<sub>3</sub>) δ 0.11 (s, 9H), 2.36 (s, 3H), 4.86 (q, *J* = 6.2 Hz, 1H), 7.16 (d, *J* = 8.0 Hz, 2H), 7.80 (d, *J* = 8.0 Hz, 2H); <sup>19</sup>F NMR (CDCl<sub>3</sub>) δ -78.6 (d, *J* = 6.0 Hz, 3F); IR (neat) 2961, 1368, 1271, 1256, 1171, 1133, 883, 845, 755, 681 cm<sup>-1</sup>; MS (EI, *m/z*) 262 (M<sup>+</sup>). These assignments are in good accord with those in the literature.<sup>1</sup>

**Trimethyl[2,2,2-trifluoro-1-(2-methoxyphenyl)ethoxy]silane (2e).<sup>2</sup>**

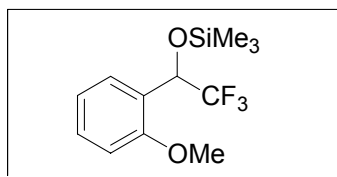

Reaction of **1e** (27.2 mg, 0.20 mmol), CsOH·H<sub>2</sub>O (3.4 mg, 0.020 mmol), Me<sub>3</sub>SiCF<sub>3</sub> (59.1 μL, 0.40 mmol) in Solkane<sup>®</sup> 365mfc (0.5 mL) at room temperature for 1 h gave **2e** (44.5 mg, 80%) as a colorless oil. <sup>1</sup>H NMR (CDCl<sub>3</sub>) δ 0.08 (s, 9H), 3.84 (s, 3H), 5.53 (q, *J* = 6.6 Hz, 1H), 6.87 (d, *J* = 8.4 Hz, 1H), 6.98 (dt, *J* = 1.8, 7.4 Hz, 1H), 7.31 (dt, *J* = 1.8, 8.4 Hz, 1H), 7.56 (d, *J* = 7.6 Hz, 1H); <sup>19</sup>F NMR (CDCl<sub>3</sub>) δ -78.3 (d, *J* = 6.6 Hz, 3F); IR (neat) 2961, 2843, 1605, 1592, 1494, 1467, 1442, 1378, 1250, 1173, 1134, 1090, 1050, 1030, 885, 847, 756, 685, 628 cm<sup>-1</sup>; MS (ESI, *m/z*) 301 (M + Na<sup>+</sup>). These assignments are in good accord with those in the literature.<sup>2</sup>

**Trimethyl[2,2,2-trifluoro-1-(3-methoxyphenyl)ethoxy]silane (2f).**

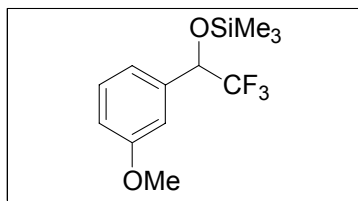

Reaction of **1f** (24.4 μL, 0.20 mmol), KOH (2.2 mg, 0.020 mmol), Me<sub>3</sub>SiCF<sub>3</sub> (59.1 μL, 0.40 mmol) in Solkane<sup>®</sup> 365mfc (0.5 mL) at room temperature for 1 h gave **2f** (51.1 mg, 92%) as a colorless oil. <sup>1</sup>H NMR (CDCl<sub>3</sub>) δ 0.12 (s, 9H), 3.81 (s, 3H), 4.88 (q, *J* = 6.6 Hz, 1H), 6.86–6.92 (m, 1H), 6.98–7.01 (m, 2H), 7.27 (t, *J* = 14.4 Hz, 1H); <sup>19</sup>F NMR (CDCl<sub>3</sub>) δ -78.1 (d, *J* = 5.3 Hz, 3F); IR (neat) 2960, 2902, 2839, 1604, 1492, 1467, 1457, 1438, 1366, 1257, 1171, 1133, 1086, 1050, 920, 879, 845, 785, 763, 709 cm<sup>-1</sup>; MS (EI, *m/z*) 278 (M).

**Trimethyl[2,2,2-trifluoro-1-(4-methoxyphenyl)ethoxy]silane (2g).<sup>1</sup>**

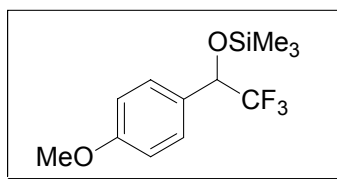

Reaction of **1g** (24.2  $\mu\text{L}$ , 0.20 mmol), KOH (2.2 mg, 0.020 mmol),  $\text{Me}_3\text{SiCF}_3$  (59.1  $\mu\text{L}$ , 0.40 mmol) in Solkane<sup>®</sup> 365mfc (0.5 mL) at room temperature for 25 min gave **2g** (52.5 mg, 94%) as a colorless oil.  $^1\text{H}$  NMR ( $\text{CDCl}_3$ )  $\delta$  0.09 (s, 9H), 3.81 (s, 3H), 4.84 (q,  $J = 6.6$  Hz, 1H), 6.88 (dt,  $J = 2.4, 8.4$  Hz, 2H), 7.34 (d,  $J = 8.4$  Hz, 2H);  $^{19}\text{F}$  NMR ( $\text{CDCl}_3$ )  $\delta$  -78.8 (d,  $J = 6.0$  Hz, 3F); IR (neat) 2960, 2840, 1614, 1516, 1466, 1368, 1254, 1172, 1131, 1036, 882, 845, 754, 682, 623, 587, 527  $\text{cm}^{-1}$ ; MS (EI,  $m/z$ ) 278 ( $\text{M}^+$ ). These assignments are in good accord with those in the literature.<sup>1</sup>

#### Trimethyl[2,2,2-trifluoro-1-(4-bromophenyl)ethoxy]silane (**2h**).<sup>1</sup>

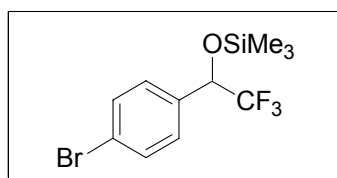

Reaction of **1h** (37.0 mg, 0.20 mmol),  $\text{CsOH}\cdot\text{H}_2\text{O}$  (3.4 mg, 0.020 mmol),  $\text{Me}_3\text{SiCF}_3$  (59.1  $\mu\text{L}$ , 0.40 mmol) in Solkane<sup>®</sup> 365mfc (0.5 mL) at room temperature for 20 min gave **2h** (57.6 mg, 88%) as a colorless oil.  $^1\text{H}$  NMR ( $\text{CDCl}_3$ )  $\delta$  0.12 (s, 9H), 4.86 (q,  $J = 6.4$  Hz, 1H), 7.27 (d,  $J = 8.2$  Hz, 2H), 7.50 (dt,  $J = 2.0, 8.2$  Hz, 2H);  $^{19}\text{F}$  NMR ( $\text{CDCl}_3$ )  $\delta$  -78.6 (d,  $J = 7.0$  Hz, 3F); IR (neat) 2960, 2900, 1594, 1489, 1407, 1367, 1257, 1173, 1135, 1012, 880, 846, 755, 725, 667, 622  $\text{cm}^{-1}$ ; MS (EI,  $m/z$ ) 328 ( $\text{M}^+ + 1$ ), 328 ( $\text{M}^+ - 1$ ). These assignments are in good accord with those in the literature.<sup>1</sup>

#### Trimethyl[2,2,2-trifluoro-1-(4-nitrophenyl)ethoxy]silane (**2i**).<sup>1</sup>

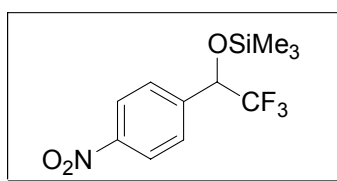

Reaction of **1i** (30.2 mg, 0.20 mmol), CsF (6.1 mg, 0.040 mmol),  $\text{Me}_3\text{SiCF}_3$  (59.1  $\mu\text{L}$ , 0.40 mmol) in Solkane<sup>®</sup> 365mfc (0.5 mL) at room temperature for 20 min gave **2i** (55.1 mg, 94%) as a colorless oil.  $^1\text{H}$  NMR ( $\text{CDCl}_3$ )  $\delta$  0.15 (s, 9H), 5.01 (q,  $J = 6.4$  Hz, 1H), 7.64 (d,  $J = 8.2$  Hz, 2H), 8.24 (dt,  $J = 2.0, 8.2$  Hz, 2H);  $^{19}\text{F}$  NMR ( $\text{CDCl}_3$ )  $\delta$  -78.2 (d,  $J = 7.0$  Hz, 3F); IR (neat) 2961, 2900, 1528, 1351, 1269, 1176, 1138, 1016, 879, 848, 753, 710, 623, 554, 533  $\text{cm}^{-1}$ ; MS (EI,  $m/z$ ) 293 ( $\text{M}^+$ ). These assignments are in good accord with those in the literature.<sup>1</sup>

#### Trimethyl[[(2E)-3-phenyl-1-(trifluoromethyl)-2-propenyl]oxy]silane (**2j**).<sup>1</sup>

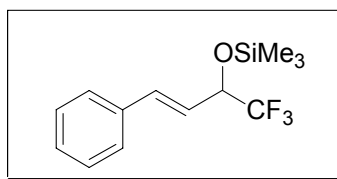

Reaction of **1j** (25.2  $\mu\text{L}$ , 0.20 mmol), CsOH $\cdot$ H<sub>2</sub>O (3.4 mg, 0.020 mmol), Me<sub>3</sub>SiCF<sub>3</sub> (59.1  $\mu\text{L}$ , 0.40 mmol) in Solkane<sup>®</sup> 365mfc (0.5 mL) at room temperature for 20 min gave **2j** (46.0 mg, 84%) as a colorless oil. <sup>1</sup>H NMR (CDCl<sub>3</sub>)  $\delta$  0.20 (s, 9H), 4.54 (ddq,  $J$  = 6.2, 6.2, 1.4 Hz, 1H), 6.16 (dd,  $J$  = 6.2, 15.8 Hz, 1H), 6.74 (d,  $J$  = 15.8 Hz, 1H) 7.24–7.43 (m, 5H); <sup>19</sup>F NMR (CDCl<sub>3</sub>)  $\delta$  -78.5 (d,  $J$  = 6.6 Hz, 3F); IR (neat) 3030, 2961, 1373, 1271, 1132, 970, 893, 847, 749, 694 cm<sup>-1</sup>; MS (EI,  $m/z$ ) 274 (M<sup>+</sup>). These assignments are in good accord with those in the literature.<sup>1</sup>

#### Trimethyl[3-phenyl-1-(trifluoromethyl)propoxy]silane (**2k**).<sup>1</sup>

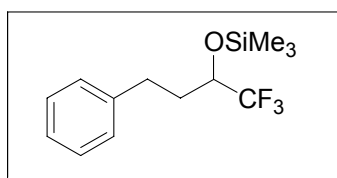

Reaction of **1k** (26.3  $\mu\text{L}$ , 0.20 mmol), CsF (6.1 mg, 0.040 mmol), Me<sub>3</sub>SiCF<sub>3</sub> (59.1  $\mu\text{L}$ , 0.40 mmol) in Solkane<sup>®</sup> 365mfc (0.5 mL) at room temperature for 20 min gave **2k** (45.3 mg, 82%) as a colorless oil. <sup>1</sup>H NMR (CDCl<sub>3</sub>)  $\delta$  0.11 (s, 9H), 1.91–2.00 (m, 2H), 2.52–2.68 (m, 1H), 2.76–2.91 (m, 1H), 3.83–3.99 (m, 1H), 7.16–7.33 (m, 5H); <sup>19</sup>F NMR (CDCl<sub>3</sub>)  $\delta$  -78.5 (d,  $J$  = 6.6 Hz, 3F); IR (neat) 2961, 1279, 1255, 1164, 1132, 977, 845, 752, 699 cm<sup>-1</sup>; MS (EI,  $m/z$ ) 276 (M<sup>+</sup>). These assignments are in good accord with those in the literature.<sup>1</sup>

#### Trimethyl(2,2,2-trifluoro-1-methyl-1-naphthylethoxy)silane (**2l**).

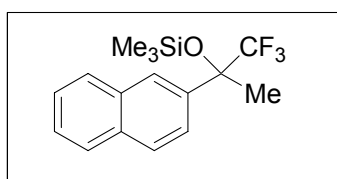

Reaction of **1l** (34.0 mg, 0.20 mmol), KOH (2.2 mg, 0.020 mmol), Me<sub>3</sub>SiCF<sub>3</sub> (59.1  $\mu\text{L}$ , 0.40 mmol) in Solkane<sup>®</sup> 365mfc (0.5 mL) at room temperature for 1 h gave **2l** (60.4 mg, 97%) as a colorless oil. <sup>1</sup>H NMR (CDCl<sub>3</sub>)  $\delta$  0.18 (s, 9H), 1.92 (s, 3H), 7.43–7.51 (m, 2H), 7.64–7.69 (m, 1H), 7.80–7.84 (m, 3H), 7.97 (brs, 1H); <sup>19</sup>F NMR (CDCl<sub>3</sub>)  $\delta$  -81.1 (s, 3F); IR (neat) 3061, 3005, 2960, 1602, 1508, 1462, 1381, 1295, 1255, 1226, 1172, 1130, 1101, 1068, 998, 950, 865, 845, 811, 746 cm<sup>-1</sup>; MS (EI,  $m/z$ ) 312 (M)

#### Trimethyl(2,2,2-trifluoro-1-methyl-1-phenylethoxy)silane (**2m**).<sup>1</sup>

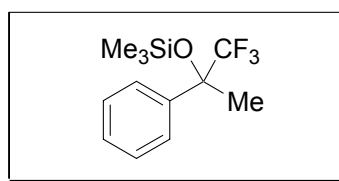

Reaction of **1m** (23.3  $\mu\text{L}$ , 0.20 mmol),  $\text{CsOH}\cdot\text{H}_2\text{O}$  (3.4 mg, 0.020 mmol),  $\text{Me}_3\text{SiCF}_3$  (59.1  $\mu\text{L}$ , 0.40 mmol) in Solkane<sup>®</sup> 365mfc (0.5 mL) at room temperature for 20 min gave **2m** (46.6 mg, 89%) as a colorless oil.  $^1\text{H}$  NMR ( $\text{CDCl}_3$ )  $\delta$  0.14 (s, 9H), 1.82 (s, 3H), 7.24–7.38 (m, 2H), 7.51–7.55 (m, 2H)  $^{19}\text{F}$  NMR ( $\text{CDCl}_3$ )  $\delta$  -81.6 (s, 3F); IR (neat) 2961, 1449, 1381, 1297, 1255, 1172, 1105, 1073, 995, 864, 845, 759, 698, 653  $\text{cm}^{-1}$ ; MS (EI,  $m/z$ ) 262 ( $\text{M}^+$ ). These assignments are in good accord with those in the literature.<sup>1</sup>

### Trimethyl(2,2,2-trifluoro-1,1-diphenyl-ethoxy)silane (**2n**).<sup>3</sup>

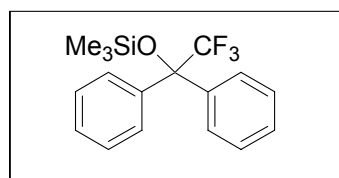

Reaction of **1n** (36.4 mg, 0.20 mmol),  $\text{CsOH}\cdot\text{H}_2\text{O}$  (3.4 mg, 0.020 mmol),  $\text{Me}_3\text{SiCF}_3$  (59.1  $\mu\text{L}$ , 0.40 mmol) in Solkane<sup>®</sup> 365mfc (0.5 mL) at room temperature for 2 h gave **2n** (60.5 mg, 93%) as a colorless oil.  $^1\text{H}$  NMR  $\delta$  0.03 (s, 9H), 7.34–7.50 (m, 10H);  $^{19}\text{F}$  NMR  $\delta$  -73.1 (s, 3H); IR (neat) 3064, 3037, 2959, 2900, 1749, 1496, 1449, 1282, 1254, 1164, 1109, 1078, 953, 938, 914, 882, 845, 763, 723, 698  $\text{cm}^{-1}$ ; MS (EI,  $m/z$ ) 324 (M). These assignments are in good accord with those in the literature.<sup>3</sup>

### Trimethyl(1-trifluoromethylcyclohexyloxy)silane (**2o**).<sup>1</sup>

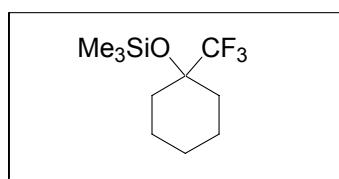

Reaction of **1o** (20.7  $\mu\text{L}$ , 0.20 mmol), KOH (2.2 mg, 0.020 mmol),  $\text{Me}_3\text{SiCF}_3$  (59.1  $\mu\text{L}$ , 0.40 mmol) in Solkane<sup>®</sup> 365mfc (0.5 mL) at room temperature for 20 min gave **2o** (34.5 mg, 72%) as a colorless oil.  $^1\text{H}$  NMR ( $\text{CDCl}_3$ )  $\delta$  0.16 (s, 9H), 1.10–1.80 (m, 10H);  $^{19}\text{F}$  NMR ( $\text{CDCl}_3$ )  $\delta$  -82.3 (s, 3F); IR (KBr) 2943, 2865, 1453, 1362, 1310, 1285, 1253, 1158, 1089, 1037, 899, 845, 757, 644  $\text{cm}^{-1}$ ; MS (EI,  $m/z$ ) 240 ( $\text{M}^+$ ). These assignments are in good accord with those in the literature.<sup>1</sup>

**(4S,5S)-4-Benzyl-N-(benzyloxycarbonyl)-5-(trifluoromethyl)-5-[(trimethylsilyl)oxy]-1,3-oxazolidine(4a<sup>1</sup>)** and **(4S,5S)-4-Benzyl-N-(benzyloxycarbonyl)-5-hydroxy-5-(trifluoromethyl)-1,3-oxaz**

olidine (**4a**<sup>2</sup>).<sup>4</sup>

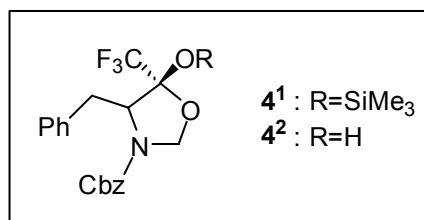

Reaction of **3** (29.5mg, 0.095 mmol), CsF (7.6 mg, 0.050 mmol), Me<sub>3</sub>SiCF<sub>3</sub> (56.2 μL, 0.38 mmol) in Solkane<sup>®</sup> 365mfc (1.0 mL) at room temperature for 15 h gave a mixture of **4**<sup>1</sup> and **4**<sup>2</sup> (38.4 mg, 97%, R = SiMe<sub>3</sub> : H = 49 : 51) as a colorless prisms and colorless oil.

**4**<sup>1</sup>: <sup>1</sup>H NMR (CDCl<sub>3</sub>) δ 0.24 (s, 9H), 2.60–2.80 (m, 1H), 3.02 (dd, *J* = 5.4, 14.0 Hz, 1H), 4.50–4.63 (m, 1H), 4.95–5.04 (m, 3H), 5.37–5.52 (m, 1H), 7.10–7.34 (m, 10H); <sup>19</sup>F NMR (CDCl<sub>3</sub>) δ –84.6 (s, 3F)

**4**<sup>2</sup>: <sup>1</sup>H NMR (CDCl<sub>3</sub>) δ 3.00 (dd, *J* = 7.1, 13.9 Hz, 1H), 3.04 (dd, *J* = 6.5, 14.1 Hz, 1H), 3.69 (brs, 1H) 4.61 (t, *J* = 6.6 Hz, 1H), 4.83 (d, *J* = 4.6 Hz, 1H), 4.91–5.10 (m, 2H), 5.36 (d, *J* = 4.4 Hz, 1H), 7.09–7.39 (m, 10H); <sup>19</sup>F NMR (CDCl<sub>3</sub>) δ –85.0 (s, 3F). These assignments are in good accord with those in the literature.<sup>4</sup>

**2. General experimental procedure for the nucleophilic ring opening fluorination of aziridines:**

The mixture of **3** (0.10 mmol) and TBAF (31.4 mg, 0.12 mmol) in Solkane<sup>®</sup> 365mfc (1.0 mL) were stirred under nitrogen atmosphere at room temperature or 50 °C (reflux). The reaction mixture was stirred for 15–28 h. Then the solvent was removed in vacuo, and the product was purified by column chromatography (benzene:ethyl acetate = 95:5) to give nucleophilic ring opened aziridines **4**.

*N*-(2-Fluorocyclohexyl)-4-methylbenzenesulfonamide (**6a**).<sup>5</sup>

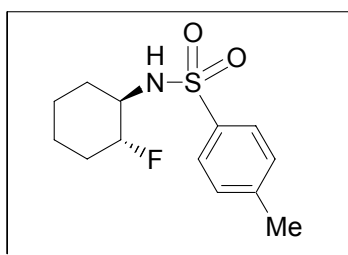

Reaction of **5a** (25.1 mg, 0.10 mmol) and TBAF (31.4 mg, 0.12 mmol) in Solkane<sup>®</sup> 365mfc (1.0 mL) at 50 °C (reflux) for 15 h gave **6a** (20.8 mg, 77%) as a white solid. <sup>1</sup>H NMR (CDCl<sub>3</sub>) δ 1.19–1.74 (m, 6H), 1.94–2.06 (m, 2H), 2.41 (s, 3H), 3.15–3.22 (m, 1H), 4.08 and 4.32 (dm, *J* = 48.0 Hz, 1H), 5.20 (d, *J* = 6.2 Hz, 1H), 7.28 (d, *J* = 8.0 Hz, 2H), 7.77 (d, *J* = 8.0 Hz, 2H); <sup>19</sup>F NMR (CDCl<sub>3</sub>) δ –177.1 (dm, *J* = 48.0 Hz, 1F) ; IR (KBr) 3304, 2951, 1598, 1496 cm<sup>-1</sup>; MS (EI, *m/z*) 271 (M<sup>+</sup>). These assignments are in good accord with those in the literature.<sup>5</sup>

### *N*-(2-Fluorocyclohexyl)-2-nitrobenzenesulfonamide (**6b**).

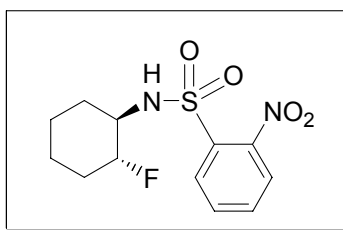

Reaction of **5b** (28.2 mg, 0.10 mmol) and TBAF (31.4 mg, 0.12 mmol) in Solkane<sup>®</sup> 365mfc (1.0 mL) at room temperature for 28 h gave **6b** (23.0 mg, 76%) as a colorless oil. <sup>1</sup>H NMR (CDCl<sub>3</sub>) δ 1.20–2.22 (m, 6H), 1.97–2.22 (m, 2H), 3.32–3.53 (m, 1H), 4.06 and 4.31 (dm, *J* = 50.0 Hz, 1H), 5.54 (d, *J* = 7.4 Hz, 1H), 7.65–7.76 (m, 2H), 7.82–7.92 (m, 1H), 8.07–8.18 (m, 1H); <sup>19</sup>F NMR (CDCl<sub>3</sub>) δ -174.7 (dm, *J* = 47.2 Hz, 1F); IR (neat) 3340, 3100, 2945, 2867, 1540, 1429, 1362, 1302, 1168, 1126, 1088, 1034, 944, 918, 896, 854, 783, 742, 731, 655 cm<sup>-1</sup>; MS (EI, *m/z*) 302 (M).

### 3. Experimental procedure for the trifluoromethylation of **1a**, isolation of **2a** with recovering Solkane<sup>®</sup> 365mfc:

To a stirred solution of **1a** (624.7mg, 4.00 mmol) and KOH (44.9 mg, 0.80 mmol) in Solkane<sup>®</sup> 365mfc (10 mL), Me<sub>3</sub>SiCF<sub>3</sub> (0.71 mL, 4.80 mmol) was added at room temperature under nitrogen atmosphere. The mixture was stirred at room temperature for 5 h, then the reaction mixture was filtered to remove KOH. Distillation of the filtrate under atmosphere pressure gave 8.86 mL (89%) of recovered Solkane<sup>®</sup> 365mfc, and 1.19 g (99.5%) of product **2a** was left which proton NMR spectrum indicated a pure **2a** compatible with the assigned structure.

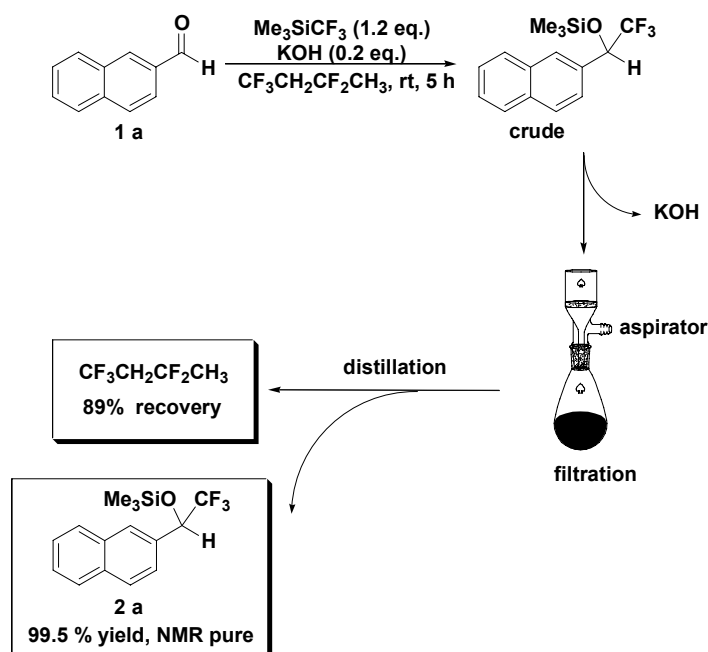



**References:**

- 1) S. Mizuta, N. Shibata, T. Sato, H. Fujimoto, S. Nakamura, T. Toru, *Synlett*, 2006, 267.
- 2) S. Mizuta, N. Shibata, M. Hibino, S. Nagano, S. Nakamura, T. Toru, *Tetrahedron*, 2007, **63**, 8521.
- 3) G. K. S. Prakash, C. Panja, H. Vaghoo, V. Surampudi, R. Kultyshev, M. Mandal, G. Rasul, T. Mathew, G. A. Olah, *J. Org. Chem.*, 2006, **71**, 6806.
- 4) M. W. Walter, R. M. Adlington, J. E. Baldwin, C. J. Schofield, *J. Org. Chem.*, 1998, **63**, 5179.
- 5) S. Noritake, N. Shibata, H. Kawai, M. K. Pandey, S. Nakamura, T. Toru, *Heterocyclic Commun.*, 2009, **15**, 2.
